# Supplementary material for: On the Relevance of Considering the Intermolecular Interactions on the Prediction of the Vibrational Spectra of Isopropylamine
Source: Hindawi journal article supplement (doi:10.1155/2013/682514), 2013-01-01

**Table S1:** Selected CP-corrected N–H distance variations and H···N distances, in pm, calculated for each molecular cluster, as a function of oligomer type and functional. Atom and cluster nomenclature in accord to Fig. 1.

|  | **N–H···N interaction** | | | | | |  |  | **C–H···N interaction** | | |
| --- | --- | --- | --- | --- | --- | --- | --- | --- | --- | --- | --- |
|  | **O2a** | **O3a** | **O3b** | **O3c** | **O4a** | **O4b** |  |  | **O2b** | **O3c** | **O4b** |
|  | ***PW91PW*** | | | | | | | | | | |
| **N(4A)–H** | 0.9 | 1.3 | 0.7  0.7 | 1.0 | 1.0  0.8 | 0.8  0.7 |  | **C(2C)–H** | -0.4 | -0.4 | -0.3 |
| **N(4A)–H···N(4B/4D)** | 212.7 | 206.8 | 221.0  224.2 | 211.5 | 214.0  218.1 | 222.4  218.9 |  | **C(2C)–H···N(A)** | 272.8 | 271.9 | 286.4 |
| **N(4C)–H···N(4A)** |  | 205.5 |  |  | 202.2 |  |  |  |  |  |  |
|  | ***B3LYP*** | | | | | | | | | | |
| **N(4A)–H** | 0.5 | 0.8 | 0.4  0.4 | 0.6 | 0.6  0.5 | 0.4  0.4 |  | **C(2C)–H** | -0.4 | -0.4 | -0.4 |
| **N(4A)–H···N(4B/4D)** | 222.6 | 217.3 | 231.5  234.1 | 220.9 | 225.2  230.4 | 232.6  229.5 |  | **C(2C)–H···N(A)** | 286.1 | 283.3 | 300.7 |
| **N(4C)–H···N(4A)** |  | 216.0 |  |  | 213.2 |  |  |  |  |  |  |
|  | ***mPW1PW*** | | | | | | | | | | |
| **N(4A)–H** | 0.7 | 1.1 | 0.6  0.6 | 0.8 | 0.8  0.7 | 0.6  0.6 |  | **C(2C)–H** | -0.4 | -0.4 | -0.4 |
| **N(4A)–H···N(4B/4D)** | 218.0 | 213.2 | 227.7  229.9 | 217.0 | 220.9  227.4 | 228.9  226.3 |  | **C(2C)–H···N(A)** | 287.7 | 285.1 | 304.8 |
| **N(4C)–H···N(4A)** |  | 211.8 |  |  | 210.4 |  |  |  |  |  |  |
|  | ***B971*** | | | | | | | | | | |
| **N(4A)–H** | 0.6 | 1.0 | 0.5  0.5 | —  — | 0.7  0.6 | 0.6  0.6 |  | **C(2C)–H** | -0.4 | — | -0.4 |
| **N(4A)–H···N(4B/4D)** | 220.2 | 214.1 | 228.2  231.3 | —  — | 221.6  224.8 | 229.3  226.9 |  | **C(2C)–H···N(A)** | 279.2 | — | 287.3 |
| **N(4C)–H···N(4A)** |  | 212.9 |  |  | 210.0 |  |  |  |  |  |  |
|  | ***B97D*** | | | | | | | | | | |
| **N(4A)–H** | 0.7 | 1.0 | 0.4  0.3 | 0.8 | 0.8  0.6 | 0.5  0.5 |  | **C(2C)–H** | -0.5 | -0.6 | -0.6 |
| **N(4A)–H···N(4B/4D)** | 212.8 | 204.7 | 220.2  232.0 | 211.1 | 209.6  219.1 | 219.1  218.7 |  | **C(2C)–H···N(A)** | 260.7 | 264.1 | 256.4 |
| **N(4C)–H···N(4A)** |  | 203.2 |  |  | 205.4 |  |  |  |  |  |  |
|  | ***wB97XD*** | | | | | | | | | | |
| **N(4A)–H** | 0.7 | 0.9 | 0.6  0.6 | 0.7 | 0.7  0.7 | 0.6  0.6 |  | **C(2C)–H** | -0.4 | -0.4 | -0.4 |
| **N(4C)–H···N(4A)** | 214.8 | 208.0 | 219.9  218.8 | 212.0 | 212.7  216.4 | 218.5  218.0 |  | **C(2C)–H···N(A)** | 264.2 | 248.5 | 252.8 |
| **N(4C)–H···N(A)** |  | 206.3 |  |  | 205.8 |  |  |  |  |  |  |

**Table S2:** Vibrational frequency shifts predicted with B97D functional for the NH2 and C(2)–H molecular groups.In each case, the second line refers to the CP-corrected value. Cluster nomenclature in accord to Fig. 1.

| **M** | **mode** | **O2a** | |  | **O2b** | |  | **O3a** | **O3b** | **O3c** | **O4a** | **O4b** |
| --- | --- | --- | --- | --- | --- | --- | --- | --- | --- | --- | --- | --- |
| **unit A** | **unit B** |  | **unit A** | **unit C** |  | **unit A** | | | | |
| 3457 | **asNH2** | -40  -41 | 11  3 |  | 7  2 | 0  -6 |  | -21  -36 | -67  -73 | -38  -32 | -116  -115 | -98  -91 |
| 3358 | **sNH2** | -98  -87 | 10  2 |  | 6  2 | -2  -6 |  | -131  -130 | -62  -69 | -108  -81 | -120  -112 | -90  -87 |
| 1665 | **NH2** | -30  33 | -9  -4 |  | -2  0 | -2  0 |  | 29  36 | 45  47 | 33  31 | 44  53 | 49  49 |
| 1250 | **tNH2** | 21  21 | -2  0 |  | -11  1 | 9  12 |  | 22  26 | 27  30 | 20  14 | 42  44 | 37  33 |
| 858 | **NH2** | 58  57 | 12  16 |  | 0  5 | 14  10 |  | 50  71 | 69  66 | 62  48 | 84  76 | 76  71 |
| 308 | **NH2** | 140  139 | 14  19 |  | -2  -3 | 25  -1 |  | 229  219 | 260  250 | 139  127 | 334  314 | 285  273 |
| 2845 | **C(2)–H** | -13  -16 | 23  20 |  | 9  6 | 73  68 |  | 7  -3 | -18  -25 | -3  -8 | -7  -16 | -19  -22 |
| 1370 | **C(2)–H** | 0  0 | 0  1 |  | 1  1 | 36  4 |  | 2  3 | -2  -2 | -1  -2 | 1  4 | 3  -2 |
| 1353 | **C(2)–H** | 1  3 | 0  2 |  | 0  2 | 16  25 |  | -4  3 | 0  1 | -3  3 | 2  3 | 1  3 |

**Table S3:** Vibrational frequency shifts predicted with PW91PW functional for the NH2 and C(2)–H molecular groups.In each case, the second line refers to the CP-corrected value. Cluster nomenclature in accord to Fig. 1.

| **** | **mode** | **O2a** | |  | **O2b** | |  | **O3a** | **O3b** | **O3c** | **O4a** | **O4b** |
| --- | --- | --- | --- | --- | --- | --- | --- | --- | --- | --- | --- | --- |
| **unit A** | **unit B** |  | **unit A** | **unit B** |  | **unit A** | | | | |
| 3454 | **asNH2** | -43  -43 | 2  -3 |  | 7  ― | -7  ― |  | -38  -47 | -114  -109 | -40  ― | -146  -136 | -125  -116 |
| 3364 | **sNH2** | -118  -107 | 3  -2 |  | 7  ― | -9  ― |  | -185  -165 | -105  -99 | -126  ― | -133  -125 | -114  -105 |
| 1649 | **NH2** | 35  36 | -6  -3 |  | 0  ― | -5  ― |  | 35  41 | 52  56 | 35  ― | 66  61 | 51  57 |
| 1250 | **tNH2** | 19  19 | -2  1 |  | -1  ― | 8  ― |  | 14  33 | 28  29 | 21  ― | 38  38 | 34  34 |
| 858 | **NH2** | 62  61 | 16  22 |  | -1  ― | 6  ― |  | 83  83 | 77  76 | 67  ― | 97  93 | 83  78 |
| 301 | **NH2** | 194  145 | 19  19 |  | -1  ― | 3  ― |  | 231  226 | 286  272 | 153  ― | 331  317 | 291  275 |
| 2852 | **C(2)–H** | -13  -18 | 27  24 |  | 12  ― | 57  ― |  | 2  0 | -21  -31 | -7  ― | -22  -27 | -22  -31 |
| 1363 | **C(2)–H** | 1  32 | 0  31 |  | 1  ― | 38  ― |  | 3  31 | -1  -2 | 5  ― | 4  3 | 0  -1 |
| 1349 | **C(2)–H** | 0  1 | -1  0 |  | -3  ― | 16  ― |  | -3  3 | -2  0 | -1  ― | -4  5 | -4  0 |

**Table S4:** Vibrational frequency shifts predicted with B3LYP functional for the NH2 and C(2)–H molecular groups.In each case, the second line refers to the CP-corrected value. Cluster nomenclature in accord to Fig. 1.

| **** | **mode** | **O2a** | |  | **O2b** | |  | **O3a** | **O3b** | **O3c** | **O4a** | **O4b** |
| --- | --- | --- | --- | --- | --- | --- | --- | --- | --- | --- | --- | --- |
| **unit A** | **unit B** |  | **unit A** | **unit B** |  | **unit A** | | | | |
| 3537 | **asNH2** | -34  -33 | -3  -6 |  | 4  ― | -7  ― |  | -38  -43 | -64  -64 | -33  ― | -88  -86 | -72  ― |
| 3452 | **sNH2** | -61  -55 | -2  -4 |  | 5  ― | -7  ― |  | -105  -94 | -59  -59 | -70  ― | -80  -75 | -65  ― |
| 1696 | **NH2** | 33  33 | -6  -2 |  | 0  ― | -3  ― |  | 34  37 | 49  49 | 32  ― | 56  56 | 52  ― |
| 1282 | **tNH2** | 17  18 | -1  3 |  | -1  ― | 7  ― |  | 18  29 | 28  28 | 19  ― | 38  37 | 36  ― |
| 879 | **NH2** | 64  56 | 20  25 |  | 2  ― | 8  ― |  | 84  84 | 75  75 | 60  ― | 94  93 | 81  ― |
| 301 | **NH2** | 146  141 | 17  19 |  | 9  ― | -2  ― |  | 222  214 | 255  255 | 152  ― | 295  287 | 258  ― |
| 2927 | **C(2)–H** | -13  -18 | 20  17 |  | 8  ― | 61  ― |  | 0  -3 | -21  -21 | -8  ― | -21  -13 | -20  ― |
| 1411 | **C(2)–H** | 0  -1 | -1  2 |  | 0  ― | 35  ― |  | 3  2 | -1  -1 | 1  ― | 3  2 | 1  ― |
| 1396 | **C(2)–H** | 0  0 | -1 |  | -3  ― | 13  ― |  | -2  2 | -2  -2 | -1  ― | -3  3 | -4  ― |

**Table S5:** Vibrational frequency shifts predicted with mPW1PW functional for the NH2 and C(2)–H molecular groups.In each case, the second line refers to the CP-corrected value. Cluster nomenclature in accord to Fig. 1.

| **** | **mode** | **O2a** | |  | **O2b** | |  | **O3a** | **O3b** | **O3c** | **O4a** | **O4b** |
| --- | --- | --- | --- | --- | --- | --- | --- | --- | --- | --- | --- | --- |
| **unit A** | **unit B** |  | **unit A** | **unit B** |  | **unit A** | | | | |
| 3599 | **asNH2** | -40  -38 | -2  -6 |  | 4  ― | -6  ― |  | -42  -47 | -88  -82 | -39  ― | -113  -104 | -95  -86 |
| 3508 | **sNH2** | -85  -77 | -1  -4 |  | 5  ― | -6  ― |  | -134  -119 | -83  -76 | -94  ― | -105  -96 | -87  -79 |
| 1707 | **NH2** | 34  33 | -5  -3 |  | 0  ― | -3  ― |  | 33  33 | 49  50 | 33  ― | 57  55 | 53  51 |
| 1289 | **tNH2** | 18  18 | 0  2 |  | -1  ― | 8  ― |  | 14  21 | 30  30 | 19  ― | 37  38 | 36  33 |
| 886 | **NH2** | 71  68 | 23  27 |  | 1  ― | 8  ― |  | 65  97 | 86  85 | 74  ― | 106  104 | 92  87 |
| 304 | **NH2** | 196  143 | 23  19 |  | 5  ― | -6  ― |  | 223  218 | 268  251 | 154  ― | 308  294 | 277  252 |
| 2960 | **C(2)–H** | -13  -17 | 20  18 |  | 7  ― | 52  ― |  | 1  -1 | -21  -29 | -9  ― | -20  -22 | -20  -28 |
| 1410 | **C(2)–H** | 0  0 | 0  1 |  | 1  ― | 45  ― |  | 2  2 | -1  -1 | 1  ― | 3  4 | 0  0 |
| 1402 | **C(2)–H** | 0  1 | 1  2 |  | -2  ― | 13  ― |  | 0  2 | -2  0 | -1  ― | -3  3 | -4  0 |

**Table S6:** Vibrational frequency shifts predicted with B971 functional for the NH2 and C(2)–H molecular groups.In each case, the second line refers to the CP-corrected value. Cluster nomenclature in accord to Fig. 1.

| **** | **mode** | **O2a** | |  | **O2b** | |  | **O3a** | **O3b** | **O3c** | **O4a** | **O4b** |
| --- | --- | --- | --- | --- | --- | --- | --- | --- | --- | --- | --- | --- |
| **unit A** | **unit B** |  | **unit A** | **unit B** |  | **unit A** | | | | |
| 3555 | **asNH2** | -38  -37 | -3  -8 |  | 2  ― | -10  ― |  | -40  -47 | -72  -76 | ―  ― | -103  -99 | -78  -81 |
| 3467 | **sNH2** | -74  -66 | -1  -6 |  | 3  ― | -10  ― |  | -114  -114 | -67  -71 | ―  ― | -91  -86 | -72  -74 |
| 1695 | **NH2** | 33  33 | -4  -3 |  | 1  ― | -4  ― |  | 35  38 | 47  51 | ―  ― | 61  59 | 48  52 |
| 1280 | **tNH2** | 20  19 | -1  0 |  | -1  ― | 7  ― |  | 16  30 | 27  31 | ―  ― | 37  39 | 34  34 |
| 881 | **NH2** | 61  60 | 20  22 |  | 2  ― | 8  ― |  | 81  81 | 73  75 | ―  ― | 93  92 | 80  78 |
| 300 | **NH2** | 148  141 | 24  24 |  | -1  ― | 3  ― |  | 224  222 | 258  258 | ―  ― | 303  297 | 282  269 |
| 2922 | **C(2)–H** | -9  -12 | 23  20 |  | 13  ― | 63  ― |  | 5  1 | -15  -22 | ―  ― | -14  -16 | -14  -18 |
| 1404 | **C(2)–H** | 0  -1 | 0  1 |  | 0  ― | 35  ― |  | 2  2 | -1  -1 | ―  ― | 3  3 | 3  0 |
| 1391 | **C(2)–H** | -1  0 | -2  1 |  | -2  ― | 15  ― |  | -3  -1 | -3  -1 | ―  ― | -5  4 | -4  0 |

**Table S7:** Vibrational frequency shifts predicted with wB97XD functional for the NH2 and C(2)–H molecular groups.In each case, the second line refers to the CP-corrected value. Cluster nomenclature in accord to Fig. 1.

| **** | **mode** | **O2a** | |  | **O2b** | |  | **O3a** | **O3b** | **O3c** | **O4a** | **O4b** |
| --- | --- | --- | --- | --- | --- | --- | --- | --- | --- | --- | --- | --- |
| **unit A** | **unit B** |  | **unit A** | **unit B** |  | **unit A** | | | | |
| 3611 | **asNH2** | -38  -41 | -2  -8 |  | 3  0 | -9  -12 |  | -33  -38 | -87  -88 | -32  -37 | -115  -106 | -98  -97 |
| 3521 | **sNH2** | -82  -92 | -1  -7 |  | 3  0 | -10  -12 |  | -102  -118 | -80  -83 | -77  -83 | -97  -102 | -93  -91 |
| 1709 | **NH2** | 28  37 | -6  -5 |  | -1  0 | -1  0 |  | 30  38 | 51  61 | 31  34 | 60  51 | 46  55 |
| 1288 | **tNH2** | 28  35 | 7  8 |  | 2  4 | 15  18 |  | 31  39 | 47  49 | 28  21 | 50  53 | 49  43 |
| 887 | **NH2** | 76  82 | 26  31 |  | 2  9 | 3  14 |  | 91  44 | 102  101 | 76  76 | 116  105 | 103  100 |
| 302 | **NH2** | 163  166 | 27  31 |  | 8  9 | 32  20 |  | 244  242 | 311  298 | 157  153 | 341  342 | 295  302 |
| 2968 | **C(2)–H** | -14  -17 | 15  12 |  | 2  0 | 52  41 |  | 3  -4 | -20  -26 | -8  -14 | -14  -12 | -20  -24 |
| 1413 | **C(2)–H** | 5  8 | 7  6 |  | 4  4 | 53  9 |  | 11  8 | 9  9 | 8  0 | 12  9 | 8  5 |
| 1402 | **C(2)–H** | 4  7 | 18  15 |  | 14  11 | 27  31 |  | 9  10 | 9  15 | 5  17 | 12  1 | 15  9 |

**Table S8:** Frequency shifts predicted for the NH2 and C(2)–H related vibrational modes by applying the PiMM approach to the CP-uncorrected and CP-corrected B97D results(second line values are CP-corrected). Cluster nomenclature in accord to Fig. 1.

| **mode** | **O3a** | **O3b** | **O3c** | **O4a** | **O4b** |
| --- | --- | --- | --- | --- | --- |
| **asNH2** | -29  -38 | -80  -82 | -33  -39 | -69  -79 | -73  -80 |
| **sNH2** | -88  -85 | -196  -174 | -92  -85 | -186  -172 | -190  -172 |
| **NH2** | -39  29 | 60  66 | -32  33 | -69  62 | -62  66 |
| **tNH2** | 19  21 | 42  42 | 10  22 | 40  42 | 31  43 |
| **NH2** | 70  73 | 116  114 | 58  62 | 128  130 | 116  119 |
| **NH2** | 154  158 | 280  278 | 138  136 | 294  297 | 278  275 |
| **C(2)–H** | 10  4 | -26  -32 | -4  -10 | -3  -12 | -17  -26 |
| **C(2)–H** | 0  1 | 0  0 | 1  1 | 0  1 | 1  1 |
| **C(2)–H** | 1  5 | 2  6 | 1  5 | 2  8 | 2  8 |

**Figure Caption**

**Figure S1:** Variation of the CP-corrected Eolig as a function of oligomer size and functional: (A) oligomers presenting just N–H···N interactions (**group I**) and (B) oligomers also C–H···N contacts (**group II**).

**Figure S1**


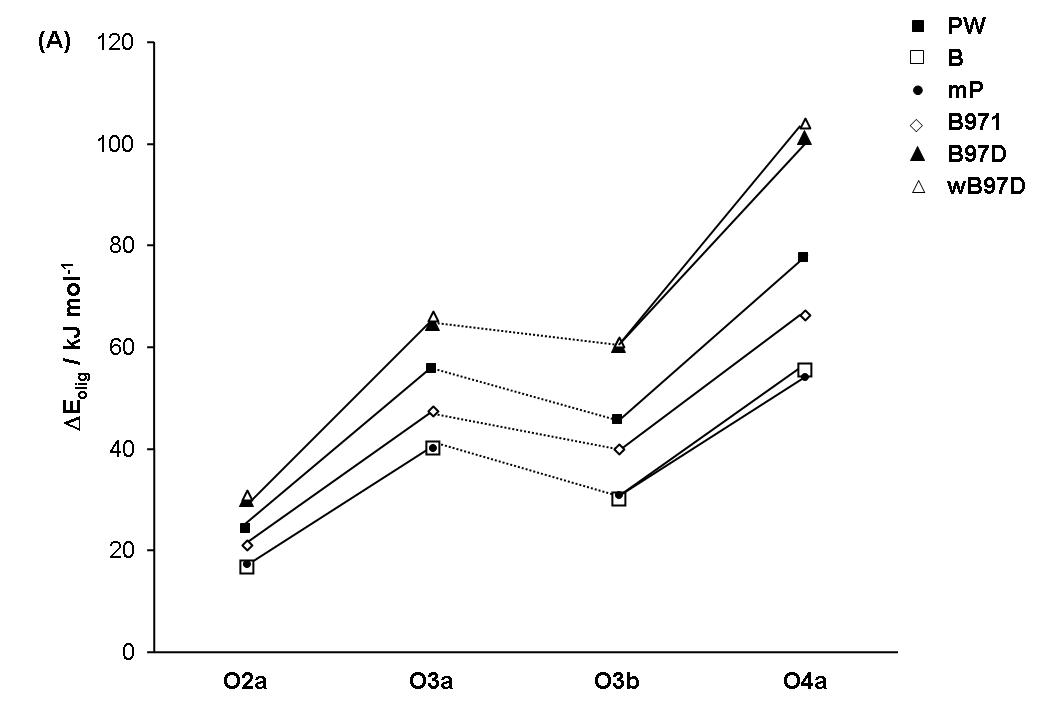


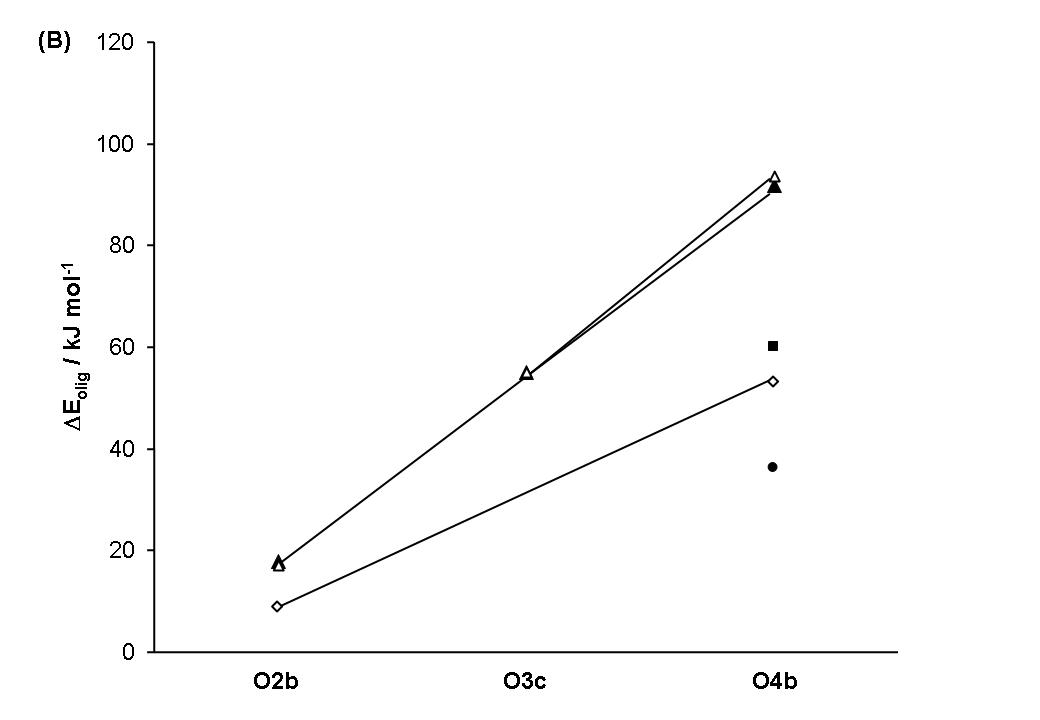

Supplement: f1 [file 682514.f1.doc]
